# Supplementary material
Source: PubMed Central journal article supplement (PMC9541450)
Supplement: NPH-233-1289-s004.pdf [file NPH-233-1289-s004.pdf]

## New Phytologist Supporting Information

### MoErv29 promotes apoplastic effector secretion contributing to virulence of the rice blast fungus *Magnaporthe oryzae*

Bin Qian, Xiaotong Su, Ziyuan Ye, Xinyu Liu, Muxing Liu, Danyu Shen, Han Chen,  
Haifeng Zhang, Ping Wang, and Zhengguang Zhang

1 November 2021

Table S1. Primers used in this study

| Primer name    | Sequence (5'-3')                                                                           | Remark                                      |
|----------------|--------------------------------------------------------------------------------------------|---------------------------------------------|
| ERV29 F1       | TAAATCGATCGAGTGGGAATCGTCTATCCAAG                                                           | amplify <i>MoERV29</i> 5' flank sequence    |
| ERV29 F2       | TAAGAATTCGTTGCTAGCTCTACCCGGAG                                                              | amplify <i>MoERV29</i> 5' flank sequence    |
| ERV29 F3       | TAATCTAGAGAAAAACGACGCATCACACAATTG                                                          | amplify <i>MoERV29</i> 3' flank sequence    |
| ERV29 F4       | TAACCGCGGGAGAGACAAGACTTCCTTCTGTC                                                           | amplify <i>MoERV29</i> 3' flank sequence    |
| ERV29 KO-F     | GGAGACTAGTTTACGTGGCCGCTAAC                                                                 | amplify <i>MoERV29</i> probe sequence       |
| ERV29 KO-R     | GAAGTACATCTTGCGGTCCTTCTCCTC                                                                | amplify <i>MoERV29</i> probe sequence       |
| ERV29 BY       | CTACATATGCAGTGTCTGATGTG                                                                    | validation of <i>MoERV29</i> deletion (HPH) |
| HPH R          | GCTGATCTGACCAGTTGCCTA                                                                      |                                             |
| ERV29 HB-F1    | ACTCACTATAGGGCGAATTGGGTACTCAAATTGGTTCAACCTTCACAC<br>CCAACCTTAG                             | <i>MoERV29</i> complementation              |
| ERV29 HB-R1    | CACCACCCCGGTGAACAGCTCCTCGCCCTTGCTCACGTAAACCTT<br>CTTCTCGTCG                                | <i>MoERV29</i> complementation              |
| AD-ERV29 F1    | TACCAGATTACGCTCATATGATGTCGCAACGAGGACCTTCGGGC                                               | Construction of AD-ERV29                    |
| AD-ERV29 R1    | TGCCACCCCGGTGGAATTTCTAGTAAACCTTCTTCTCTCGTCG                                                | Construction of AD-ERV29                    |
| BD-ERV29 F1    | TGATCTCAGAGGAGGACCTGCATATGATGTCGCAACGAGGACCTT<br>CGGGC                                     | Construction of BD-ERV29                    |
| BD-ERV29 R1    | GCAGGTCGACGGATCCCCGGGAATTTCTAGTAAACCTTCTTCTTCT<br>CGTCG                                    | Construction of BD-ERV29                    |
| MoHac1 32a F1: | CAAGGCCATGGCTGATATCATGAACACTTGGAGCTCCACCCAG                                                | Construction of MoHac1 32a                  |
| MoHac1 32a F2: | GTGCGGCCGCAAGCTTGTCGACCTATAGACTACCTTGCTCGTTGC                                              | Construction of MoHac1 32a                  |
| Slp1-Stag F1   | TTTCGTAGGAACCCAATCTTCAAAAATGCAGTTTCGCTACCATCACC                                            | Construction of Slp1-S                      |
| Slp1-Stag R1   | GCTCCTCGCCCTTGCTCACTTAGCTATCCACATGCTGACGTTCAAA<br>TTTCGCCGCCGCGGTTTCTTTGTTCTTGCAGATGGGGATG | Construction of Slp1-S                      |
| Slp1-GFP F1    | ACTCACTATAGGGCGAATTGGGTACTCAAATTGGTTCGCACAATTG<br>AACAGTGCGATG                             | Construction of Slp1-GFP                    |
| Slp1-GFP R1    | CACCACCCCGGTGAACAGCTCCTCGCCCTTGCTCACGTTCTTGCA<br>GATGGGGATG                                | Construction of Slp1-GFP                    |
| Bas4-GFP F1    | TTTCGTAGGAACCCAATCTTCAAAAATGCAGCTCTCATTCTCAGCA<br>ATC                                      | Construction of Bas4-GFP                    |
| Bas4-GFP R1    | CACCACCCCGGTGAACAGCTCCTCGCCCTTGCTCACAGCAGGGG<br>GGATAGACGAGC                               | Construction of Bas4-GFP                    |
| 28S rDNA LL    | TACGAGAGGAACCGCTCATTACAGATAATTA                                                            | qRT-PCR                                     |

|                  |                                                              |                                        |
|------------------|--------------------------------------------------------------|----------------------------------------|
| 28S rDNA RR      | TCAGCAGATCGTAACGATAAAGCTACTC                                 | qRT-PCR                                |
| Rubq1 LL         | GTGGTGGCCAGTAAGTCCTC                                         | qRT-PCR                                |
| Rubq1 RR         | GGACACAATGATTAGGGATCA                                        | qRT-PCR                                |
| MGG_00227 F1     | GTATCGATAAGCTTGATATCGCCAAACCCATACCGCGATTG                    | amplify MGG_00227 5' flank sequence    |
| MGG_00227 R1     | GGTGGAGGATGGGCAAGGTAG                                        | amplify MGG_00227 5' flank sequence    |
| Hph F:           | CTACCTTGCCCATCTCCACCGGAGGTCAACACATCAATG                      | amplify Hph sequence                   |
| Hph R:           | CTCTATTCTTTGCCCTCG                                           | amplify Hph sequence                   |
| <hr/>            |                                                              |                                        |
| MGG_00227 F2:    | CGAGGGCAAAGGAATAGAGCGTGTCTTGATAGGTAGGG                       | amplify MGG_00227 3' flank sequence    |
| MGG_00227 R2:    | GGTGGCGGCCGCTCTAGAAGTCTAGTGTGAGATCAACTGTGAACT                | amplify MGG_00227 3' flank sequence    |
| MGG_00227Con F:  | GCGCAATCCGGCTACGGCACCTGC                                     | amplify MGG_00227 probe sequence       |
| MGG_00227Con R:  | CGTTGTACAGGTAACGGTAG                                         | amplify MGG_00227 probe sequence       |
| MGG_00227BY:     | CTGGTCCAACATACATCATTC                                        | validation of MGG_00227 deletion (HPH) |
| MGG_00227 GFPF1  | TTTCGTAGGAACCCAATCTTCAAATGCGCAACACGCTCGT<br>TAAC             | Construction of MGG_00227 GFPF1        |
| MGG_00227 GFPR1: | CACCACCCGGTGAACAGCTCCTCGCCCTTGCTCACATCAA<br>AATCAACGATGGTTG  | Construction of MGG_00227 GFPR1        |
| MGG_00259 F1:    | GTATCGATAAGCTTGATATCCACGGATATGTTGAAACCTTG                    | amplify MGG_00259 5' flank sequence    |
| MGG_00259 R1:    | GTTTACTTGGGGAGTTGGATG                                        | amplify MGG_00259 5' flank sequence    |
| Hph F 00259:     | CATCCAACCTCCCAAGTAAACGGAGGTCAACACATCAATG                     | amplify Hph sequence                   |
| Hph R00259:      | CTCTATTCTTTGCCCTCG                                           | amplify Hph sequence                   |
| MGG_00259 F2:    | CGAGGGCAAAGGAATAGAGGGTTGGTTGGGAAGAGATG                       | amplify MGG_00259 3' flank sequence    |
| MGG_00259 R2:    | GGTGGCGGCCGCTCTAGAAGTCTGGCCAAGGAGGGCA<br>AGCT                | amplify MGG_00259 3' flank sequence    |
| MGG_00259 Con F: | GGCGCCGTGGCCGACCTGTC                                         | amplify MGG_00259 probe sequence       |
| MGG_00259 Con R: | GCACGGTCGAGTTGTCTGCC                                         | amplify MGG_00259 probe sequence       |
| MGG_00259 BY:    | GGCACTACTTTGCCATACCAC                                        | validation of MGG_00229 deletion (HPH) |
| MGG_00259 GFPF1: | TTTCGTAGGAACCCAATCTTCAAATGAAGGTCTCACTAAG<br>CATC             | Construction of MGG_00259 GFPF1        |
| MGG_00259 GFPR1: | CACCACCCGGTGAACAGCTCCTCGCCCTTGCTCACCGGCA<br>GAGCCAACGGGCTCAG | Construction of MGG_00259 GFPR1        |
| MGG_01655 F1:    | GTATCGATAAGCTTGATATCCAGCCCATCAGGCCACTAG                      | amplify MGG_01655 5' flank sequence    |
| MGG_01655 R1:    | CTTGGCGAGTATATACAGCC                                         | amplify MGG_01655 5' flank sequence    |
| Hph 01655 F:     | GGCTGTATATACTCGCCAAGGGAGGTCAACACATCAATG                      | amplify Hph sequence                   |
| Hph 01655 R:     | CTCTATTCTTTGCCCTCG                                           | amplify Hph sequence                   |
| MGG_01655 F2:    | CGAGGGCAAAGGAATAGAGATTGACGGCACGCATTTTCGG                     | amplify MGG_01655 3' flank sequence    |
| MGG_01655 R2:    | GGTGGCGGCCGCTCTAGAAGTCTAGTAGAGCAGCGATGATT<br>GCC             | amplify MGG_01655 3' flank sequence    |
| MGG_01655 Con F: | CGGCAATCATTCCAAGATTGC                                        | amplify MGG_01655 probe sequence       |
| MGG_01655 Con R: | GTTTGGCTGCGGACCCACTG                                         | amplify MGG_01655 probe sequence       |
| MGG_01655 BY:    | CCGCGGATTACGGTCCCGCC                                         | validation of MGG_01655 deletion (HPH) |
| MGG_01655 GFPF1: | TTTCGTAGGAACCCAATCTTCAAATGACCTTGTTATCCCT                     | Construction of MGG_01655 GFPF1        |

---

|                  |                                                               |                                        |
|------------------|---------------------------------------------------------------|----------------------------------------|
|                  | CG                                                            |                                        |
| MGG_01655 GFPR1: | CACCACCCCGGTGAACAGCTCCTCGCCCTTGCTCACGACA<br>GGGCCGACACCGGGC   | Construction of MGG_01655 GFPR1        |
| MGG_05970 F1:    | GTATCGATAAGCTTGATATCCTGCCGATCGTGACCCTTAC                      | amplify MGG_05970 5' flank sequence    |
| MGG_05970 R1:    | GTGCAAGATAACGAGTGATG                                          | amplify MGG_05970 5' flank sequence    |
| Hph 05970 F:     | CATCACTCGTTATCTTGACGGAGGTCAACACATCAATG                        | amplify Hph sequence                   |
| Hph 05790 R:     | CTCTATTCCTTTGCCCTCG                                           | amplify Hph sequence                   |
| MGG_05970 F2:    | CGAGGGCAAAGGAATAGAGGCTGTCTGGTCTGGGTGAGC                       | amplify MGG_05970 3' flank sequence    |
| MGG_05970 R2:    | GGTGGCGGCCGCTCTAGAAGTATGATGGCGCTTAACCACT<br>GCG               | amplify MGG_05970 3' flank sequence    |
| MGG_05970 Con F: | CAATTCTAATCATGACTCACAG                                        | amplify MGG_05970 probe sequence       |
| MGG_05970 Con R: | CAGACCTTGGTCCAGAGTGG                                          | amplify MGG_05970 probe sequence       |
| MGG_05970 BY:    | CAAACGACCGTAACAATCGC                                          | validation of MGG_05970 deletion (HPH) |
| MGG_05970 GFPF1: | TTTCGTAGGAACCCAATCTTCAAAATGGCTCGTCACGCACT<br>CGC              | Construction of MGG_05970 GFPF1        |
| MGG_05970 GFPR1: | CACCACCCCGGTGAACAGCTCCTCGCCCTTGCTCACAATGC<br>CCGAGTCCTCCTGCG  | Construction of MGG_05970 GFPR1        |
| MGG_08127 F1:    | GTATCGATAAGCTTGATATCCACAGAACCCCGGGTAAAGTC                     | amplify MGG_08127 5' flank sequence    |
| MGG_08127 R1:    | AATGGCGGGGTCTTTGAGAG                                          | amplify MGG_08127 5' flank sequence    |
| Hph 08127 F:     | CTCTCAAAGACCCCGCCATGGAGGTCAACACATCAATG                        | amplify Hph sequence                   |
| Hph 08127 R:     | CTCTATTCCTTTGCCCTCG                                           | amplify Hph sequence                   |
| MGG_08127 F2:    | CGAGGGCAAAGGAATAGAGACTGGTCTGTGCTTCAAAGGTG                     | amplify MGG_08127 3' flank sequence    |
| MGG_08127 R2:    | GGTGGCGGCCGCTCTAGAAGTATGATGACCAATTTCCCTAG<br>TATC             | amplify MGG_08127 3' flank sequence    |
| MGG_08127 Con F: | GAGGTCGTTATAACCGCGTC                                          | amplify MGG_08127 probe sequence       |
| MGG_08127 Con R: | CGTCAATGGCGGATCCGTTGAC                                        | amplify MGG_08127 probe sequence       |
| MGG_08127 BY:    | GGTATCCCTGCCTTTTATGC                                          | validation of MGG_08127 deletion (HPH) |
| MGG_08127GFPF1:  | TTTCGTAGGAACCCAATCTTCAAAATGAATCTTCGGGACAC<br>CATC             | Construction of MGG_08127 GFP          |
| MGG_08127GFPR1:  | CACCACCCCGGTGAACAGCTCCTCGCCCTTGCTCACTCTCC<br>TCAAACCAGAGTCCAG | Construction of MGG_08127 GFP          |
| MGG_09139 GFPF1: | TTTCGTAGGAACCCAATCTTCAAAATGGTTCAATCTGTGATA<br>TTTG            | Construction of MGG_09139 GFP          |
| MGG_09139 GFPR1: | CCCGGTGAACAGCTCCTCGCCCTTGCTCACGACACCAGAAT<br>CCGCCAGCAC       | Construction of MGG_09139 GFP          |
| MGG_13464 GFPF1: | TTTCGTAGGAACCCAATCTTCAAAATGAAGGTCACCAGCTT<br>CTTC             | Construction of MGG_13464 GFP          |
| MGG_13464 GFPR1: | CCCGGTGAACAGCTCCTCGCCCTTGCTCACGACTGCGCGA<br>GCAGTGCTGTTAC     | Construction of MGG_13464 GFP          |

---
